# Supplementary material
Source: PubMed Central journal article supplement (PMC6657687)
Supplement: NIHMS1514507-supplement-3.pdf [file NIHMS1514507-supplement-3.pdf]

Supplemental Table 2.

| Characteristics      | HR for OS (95% CI) |                  |
|----------------------|--------------------|------------------|
|                      | Unadjusted         | Adjusted*        |
| Age                  | 1.02 (1.00-1.05)   | ---              |
| Sex                  | 0.55 (0.32-0.94)   | 0.54 (0.31-0.93) |
| EGOG ( $\geq 2$ )    | 1.52 (0.83-2.76)   | ---              |
| Smoking status       | 1.76 (0.95-3.24)   | ---              |
| <i>EGFR</i> Mutation | 0.38 (0.17-0.89)   | 0.37 (0.16-0.87) |
| High PECs            | 1.44 (0.84-2.48)   | 1.76 (1.02-3.05) |
| High PEC Clusters    | 1.29 (0.75-2.21)   | ---              |

\*Adjusted HRs displayed if variable remained significant in final multivariate model
