# Supplementary material
Source: PubMed Central journal article supplement (PMC6657687)
Supplement: NIHMS1514507-supplement-4.pdf [file NIHMS1514507-supplement-4.pdf]

Supplemental Table 1.

| PEC cutoff values (PECs/ml) | Sensitivity (%) | Specificity (%) |
|-----------------------------|-----------------|-----------------|
| 1                           | 99              | 35              |
| 12                          | 85              | 71              |
| 47                          | 77              | 82              |
| 77                          | 75              | 88              |
| 100                         | 74              | 94              |
| 105                         | 73              | 100             |
| 193                         | 63              | 100             |
| 350                         | 58              | 100             |
