# Supplementary material
Source: PubMed Central journal article supplement (PMC6657687)

Supplemental Figure 1.

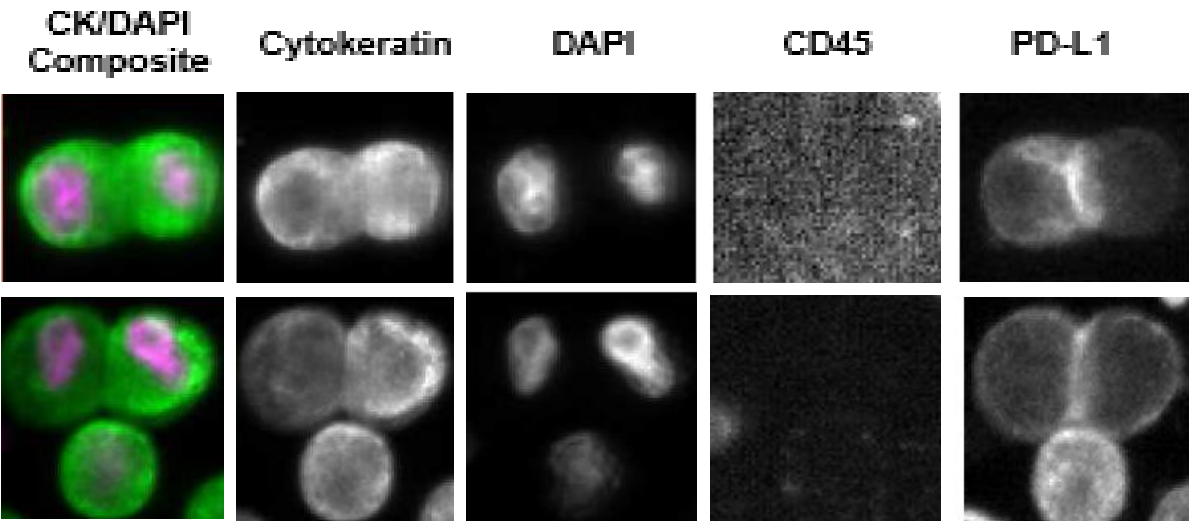

Supplement: NIHMS1514507-supplement-1.pdf [file NIHMS1514507-supplement-1.pdf]

Supplemental Figure 2.

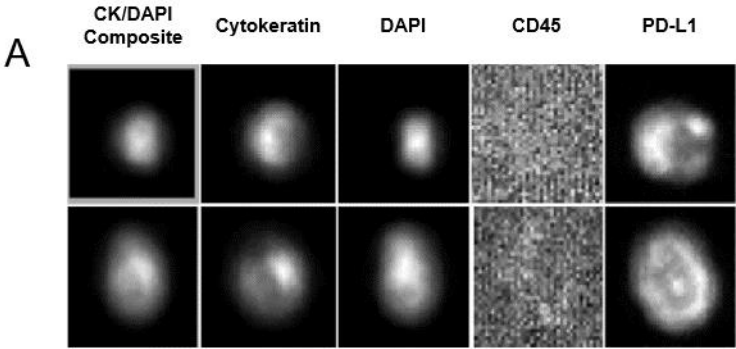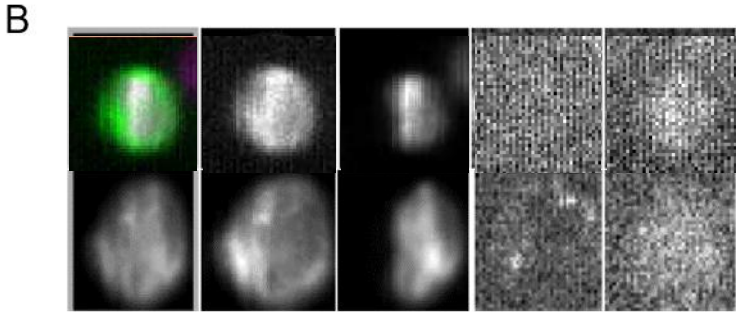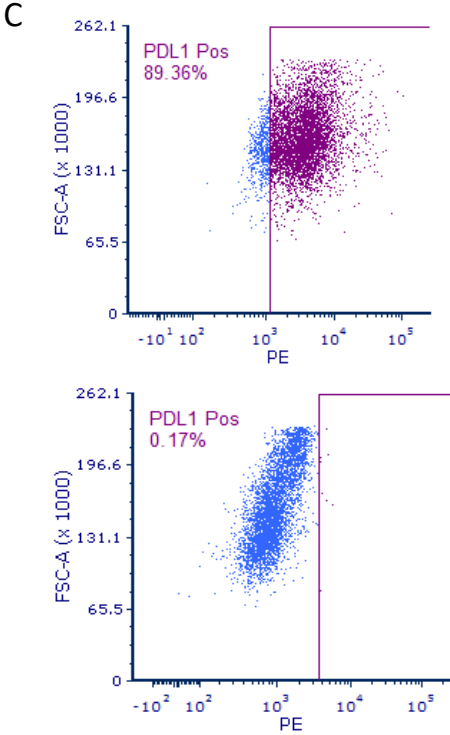

Supplement: NIHMS1514507-supplement-2.pdf [file NIHMS1514507-supplement-2.pdf]
